# Supplementary material for: Discovery of New Small Molecule Hits as Hepatitis B Virus Capsid Assembly Modulators: Structure and Pharmacophore-Based Approaches
Source: MDPI journal article supplement (doi:10.3390/v13050770), 2021-04-27
Supplement: s1 [file s1]

## Supplementary Information

# Discovery of New Small Molecule Hits as Hepatitis B Virus Capsid Assembly Modulators: Structure and Pharmacophore-Based Approaches

Sameera Senaweera <sup>1</sup>, Haijuan Du <sup>2,3</sup>, Huanchun Zhang <sup>2,3</sup>, Karen A. Kirby <sup>2,3</sup>, Philip R. Tedbury <sup>2,3</sup>, Jiashu Xie <sup>1</sup>, Stefan G. Sarafianos <sup>2,3</sup> and Zhengqiang Wang <sup>1,\*</sup>

<sup>1</sup> Center for Drug Design, College of Pharmacy, University of Minnesota, Minneapolis, MN 55455, USA

<sup>2</sup> Laboratory of Biochemical Pharmacology, Department of Pediatrics, Emory University School of Medicine, Atlanta, GA 30322, USA

<sup>3</sup> Children's Healthcare of Atlanta, Atlanta, GA 30322, USA

\* Correspondence: wangx472@umn.edu; Tel.: +1-612-626-7025

## Table of Contents

|                                                                                     |     |
|-------------------------------------------------------------------------------------|-----|
| 1. General experimental                                                             | S2  |
| 2. Scheme S1: Synthesis of in-house compounds                                       | S2  |
| 3. NMR spectra                                                                      | S7  |
| 4. Table S1: Docking scores of the selected 100 compound from the virtual screening | S13 |
| 5. Figure S1: Selected TSA curves                                                   | S32 |
| 6. References                                                                       | S33 |

## General Experimental

All commercial chemicals were used as supplied unless otherwise indicated. Flash chromatography was performed on a Teledyne Combiflash RF-200 with RediSep silica columns (silica) and indicated mobile phase. Moisture sensitive reactions were performed under an inert atmosphere of ultrapure argon with oven-dried glassware. <sup>1</sup>H and <sup>13</sup>C NMR spectra were recorded on a Varian 600 MHz spectrometer. Mass data were acquired on an Agilent TOF II TOS/MS spectrometer capable of ESI and APCI ion sources.

**Scheme 1.** Synthesis of in-house compounds.

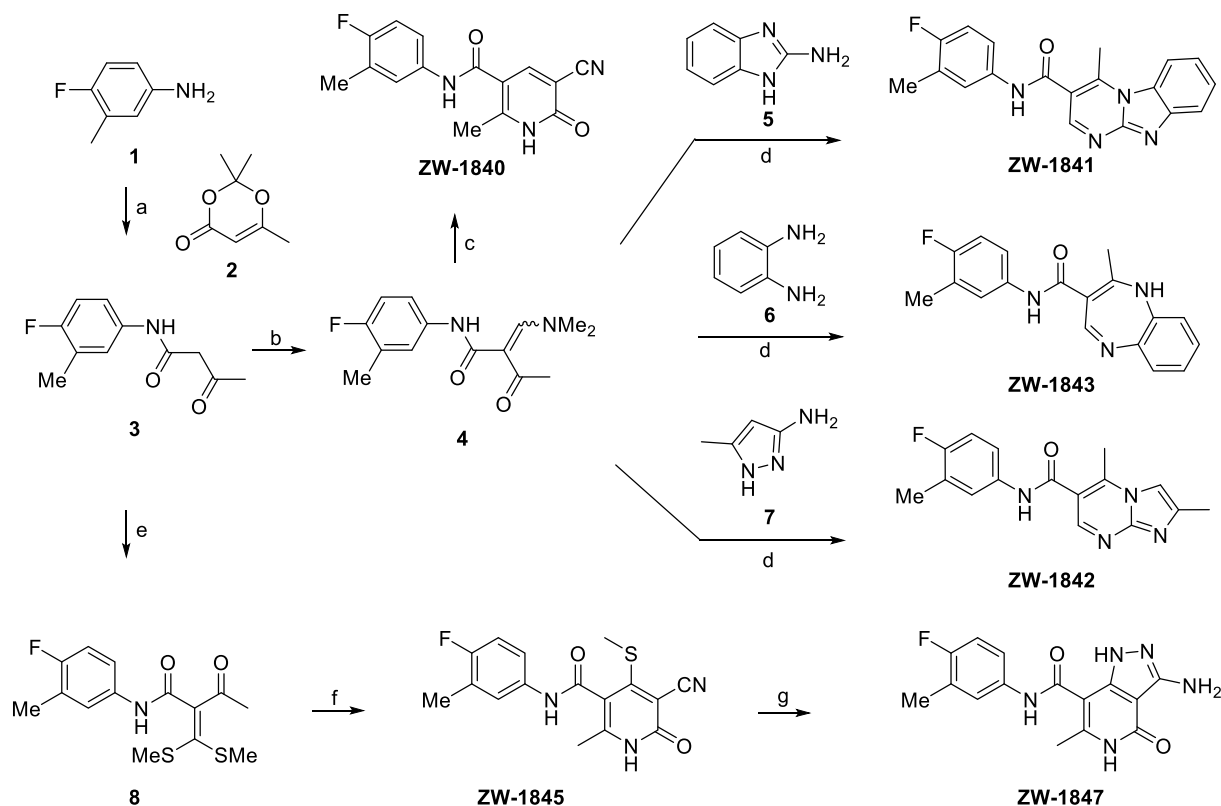

**Reagents and conditions:** a) Water, reflux; b) DMF-DMA, xylenes; c) Ethyl cyanoacetate, NaOEt, EtOH; d) RNH<sub>2</sub>, pyridine, reflux; e) NaO<sup>t</sup>Bu, CS<sub>2</sub>, THF then, MeI ; f) Cyanoacetate, NaO<sup>i</sup>Pr, <sup>i</sup>PrOH, reflux; g) NH<sub>2</sub>NH<sub>2</sub>, <sup>i</sup>PrOH, reflux

#### Synthesis of intermediate **9** (*N*-(4-fluoro-3-methylphenyl)-3-oxobutanamide)

Compound **9** was synthesized using a modified literature procedure [1]. In a round bottom flask, 4-fluoro-3-methylaniline (5.0 g, 40 mmol) and DI water (120 mL) was heated to reflux. Upon reflux, TMD (2,2,6-Trimethyl-4*H*-1,3-dioxin-4-one) (1.5 equiv) was added and the heating was maintained for another 2.5 h. Upon completion of the reaction as determined by TLC (Hex:EtOAc 1:1), the reaction mixture was allowed to cool and it was extracted with EtOAc (2x). Combined organic phase was dried with Na<sub>2</sub>SO<sub>4</sub>, filtered and concentrated. The crude was purified by silica gel column chromatography eluting with hexane and EtOAc to obtain compound **9** as an orange oil (yield = 68%). <sup>1</sup>H NMR (600 MHz, Chloroform-*d*) δ 9.04 (s, 1H), 7.38 (dd, *J* = 6.2, 3.1 Hz, 1H), 7.29 (dd, *J* = 7.8, 3.4 Hz, 1H), 6.94 (t, *J* = 10.1 Hz, 1H), 3.58 (s, 2H), 2.33 (s, 3H), 2.26 (s, 3H).

Synthesis of intermediate **10** (2-((dimethylamino)methylene)-*N*-(4-fluoro-3-methylphenyl)-3-oxobutanamide)

In a round bottom flask, intermediate **9** (2.5 g, 1.0 equiv) and DMF-DMA (1.0 equiv) was heated to 145 °C for 3 h. Then, the reaction was cooled down to room temperature. Overtime a turbidity appeared. The solvent was removed, and the resulted orange yellow solid was washed with ether (2x) and it was dried to obtain compound **10** as a white solid (yield = 74%). <sup>1</sup>H NMR (600 MHz, Chloroform-*d*) δ 10.51 (s, 1H), 7.68 (s, 1H), 7.44 (d, *J* = 7.0 Hz, 1H), 7.37 (dd, *J* = 8.1, 3.6 Hz, 1H), 6.92 (t, *J* = 9.1 Hz, 1H), 3.19 (br. s, 6H), 2.29 (s, 3H), 2.25 (s, 3H).

Synthesis of ZW-1840 (5-cyano-*N*-(4-fluoro-3-methylphenyl)-2-methyl-6-oxo-1,6-dihydropyridine-3-carboxamide)

ZW-1840 was synthesized using a modified literature procedure [2]. In a two-necked round bottom flask equipped with a reflux condenser, NaOEt (1.0 equiv) was added EtOH (1.0 mL) followed by cyanoacetamide (1.0 equiv) under Ar at room temperature. Then, a solution of compound **10** (100 mg, 1.0 equiv) in EtOH (1.5 mL) was added dropwise. The reaction was allowed to stir for 15 min before it was refluxed for 1.5 h. After the reaction time, ice water was added to the reaction and it was acidified with 2 M HCl. The resulting precipitate was collected by filtration. The solid crude was purified by silica gel column chromatography eluting with DCM and MeOH to obtain ZW-1840 as an off-white solid (yield = 35%). <sup>1</sup>H NMR (600 MHz, DMSO-*d*<sub>6</sub>) δ 10.14 (br. s, 1H), 8.60 (s, 1H), 8.02 (br. s, 1H), 7.35 (t, *J* = 9.0 Hz, 1H), 7.28 (dd, *J* = 6.8, 2.6 Hz, 1H), 7.19 (dt, *J* = 7.7, 3.6 Hz, 1H), 2.40 (s, 3H), 2.29 (s, 3H). <sup>13</sup>C NMR (101 MHz, DMSO-*d*<sub>6</sub>) δ 193.99, 169.52, 162.17, 160.86, 159.74, 157.62, 143.58, 132.06 (d, *J* = 5.9 Hz), 130.70 (d, *J* = 3.3 Hz), 128.34 (d, *J* = 9.0 Hz), 127.18 – 116.32 (m), 110.68, 92.77, 30.57, 14.21 (d, *J* = 3.1 Hz). HRMS (ESI) *m/z* calcd for C<sub>15</sub>H<sub>11</sub>FN<sub>3</sub>O<sub>2</sub> 284.0841, found 284.0830.

Synthesis of intermediate **14** (2-(bis(methylthio)methylene)-*N*-(4-fluoro-3-methylphenyl)-3-oxobutanamide)

Intermediate **14** was synthesized following a literature procedure [3]. In a two-necked round bottom flask, to a suspension of NaO<sup>t</sup>Bu (2.0 equiv) in THF (1.5 mL) at 0 °C was added a solution of CS<sub>2</sub> (1.0 equiv) and intermediate **9** (0.5 g, 1.0 equiv) in THF (3.0 mL) over 15 min. After completion of the addition, the mixture was stirred at 0 °C for another 1 h. Overtime, the

solution turned red. To this, a solution of MeI (2.0 equiv) in THF (1.0 mL) was added dropwise at 0 °C. The resulting mixture was allowed to warm up to room temperature and it was stirred for another 5 h at room temperature. The mixture was then poured onto crushed ice under stirring. The separated solid was collected by filtration, washed with water (2x), dried in vacuo and crystallized from chloroform to furnish the intermediate **14** as a yellow solid (yield = 70%). <sup>1</sup>H NMR (600 MHz, Chloroform-*d*) δ 8.18 (s, 1H), 7.47 (d, *J* = 6.3 Hz, 1H), 7.31 (dd, *J* = 8.2, 4.1 Hz, 1H), 6.96 (t, *J* = 8.9 Hz, 1H), 2.49 (s, 3H), 2.47 (br. s, 6H), 2.27 (s, 3H).

Synthesis of compound ZW-1845 (5-cyano-*N*-(4-fluoro-3-methylphenyl)-2-methyl-4-(methylthio)-6-oxo-1,6-dihydropyridine-3-carboxamide)

ZW-1845 was synthesized following a modified literature procedure [4]. In a two-necked round bottom flask, under Ar, Na<sup>i</sup>OPr was prepared by dissolving Na (1.0 equiv) in <sup>i</sup>PrOH (5.0 mL). The mixture was added cyanoacetamide (1.0 equiv) followed by dropwise addition of compound **14** (0.5 g, 1.0 equiv) in <sup>i</sup>PrOH over 15 min. The resulting mixture was further stirred at room temperature for 15 min and heated to reflux for overnight. Upon completion of the reaction as determined by TLC (Hex:EtOAc 7:3), the solvent was evaporated and the resulting solid was treated with 1 N HCl solution to obtain a solid. The solid was filtered, washed with water, and dried to afford ZW-1845 as a yellow solid (yield = 60%). <sup>1</sup>H NMR (600 MHz, DMSO-*d*<sub>6</sub>) δ 10.63 (s, 1H), 8.93 (s, 1H), 8.38 (d, *J* = 8.5 Hz, 1H), 7.93 (d, *J* = 8.2 Hz, 1H), 7.68 (dd, *J* = 7.2, 2.6 Hz, 1H), 7.64 (t, *J* = 7.7 Hz, 1H), 7.56 (dt, *J* = 8.0, 3.4 Hz, 1H), 7.47 (t, *J* = 7.8 Hz, 1H), 7.17 (t, *J* = 9.2 Hz, 1H), 3.24 (s, 3H), 2.26 (d, *J* = 2.0 Hz, 3H). <sup>13</sup>C NMR (101 MHz, DMSO) δ 163.3, 155.9, 154.3, 150.5, 150.1, 144.7, 134.9 (d, *J* = 2.9 Hz), 128.3, 126.3, 124.4 (d, *J* = 18.1 Hz), 123.0 (d, *J* = 4.8 Hz), 122.0, 119.5, 119.2 (d, *J* = 7.7 Hz), 116.9, 116.8, 115.1 (d, *J* = 23.5 Hz), 18.2, 14.4 (d, *J* = 3.1 Hz). HRMS (ESI<sup>-</sup>) *m/z* calcd for C<sub>16</sub>H<sub>13</sub>FN<sub>3</sub>O<sub>2</sub>S 330.0718, found 330.0726.

Synthesis of compound ZW-1847 (3-amino-*N*-(4-fluoro-3-methylphenyl)-6-methyl-4-oxo-4,5-dihydro-1*H*-pyrazolo[4,3-*c*]pyridine-7-carboxamide) [4]

In a 0.5-2.0 mL microwave vial equipped with a magnetic stirrer, ZW-1845 (50 mg, 1.0 equiv) was dissolved in <sup>i</sup>PrOH (0.6 mL). Then, hydrazine monohydrate (20.0 equiv) was added. The vial was sealed, and the reaction was carried out in a microwave reactor (Biotage Initiator<sup>+</sup>) at 120 °C for 40 min. Upon cooling down to room temperature, a solid product appeared in the reaction. The solid was separated and washed with MeOH (2x) followed by ether (2x) and dried

to furnish ZW-1847 as an off-white solid (yield = 60%). <sup>1</sup>H NMR (600 MHz, DMSO-*d*<sub>6</sub>) δ 10.64 (s, 2H), 7.56 (d, *J* = 7.0 Hz, 1H), 7.46 (dt, *J* = 7.6, 3.5 Hz, 1H), 7.10 (t, *J* = 9.1 Hz, 1H), 6.03 (s, 2H), 2.46 (s, 3H), 2.23 (s, 3H). <sup>13</sup>C NMR (101 MHz, DMSO-*d*<sub>6</sub>) δ 163.7, 160.5, 155.9, 153.7, 149.3 (d, *J* = 43.9 Hz), 142.7, 135.7, 124.7, 122.9, 119.3 (d, *J* = 51.2 Hz), 115.4 (d, *J* = 22.4 Hz), 101.2, 95.1, 19.1, 14.8 (d, *J* = 3.1 Hz). HRMS (ESI<sup>+</sup>) *m/z* calcd for C<sub>15</sub>H<sub>13</sub>FN<sub>5</sub>O<sub>2</sub> 314.1059, found 314.1045.

### **General method A for the synthesis of compounds 3-5**

Compounds 3-5 were prepared following a literature procedure [5]. In a pressure vial equipped with a stir bar, intermediate **10** (100 mg, 1.0 equiv) was added pyridine (1.0 mL) followed by the corresponding amine (1.0 equiv). The vial was sealed, and it was heated at 110 °C for overnight. Overtime, a solid appeared. After the reaction time it was cooled to room temperature. The solid was allowed to settle down and the liquid layer (pyridine) was separated. The solid was washed with ether (3x) followed by hot ether (1x) and dried to afford the final compounds as white solids (yield = 45 - 65%).

#### **Synthesis of ZW-1841 (*N*-(4-fluoro-3-methylphenyl)-4-methylbenzo[4,5]imidazo[1,2-*a*]pyrimidine-3-carboxamide)**

ZW-1841 was synthesized following the general method A using 2-aminobenzimidazole as the amine. <sup>1</sup>H NMR (600 MHz, DMSO-*d*<sub>6</sub>) δ 10.63 (s, 1H), 8.93 (s, 1H), 8.38 (d, *J* = 8.5 Hz, 1H), 7.93 (d, *J* = 8.2 Hz, 1H), 7.68 (dd, *J* = 7.2, 2.6 Hz, 1H), 7.64 (t, *J* = 7.7 Hz, 1H), 7.56 (dt, *J* = 8.0, 3.4 Hz, 1H), 7.47 (t, *J* = 7.8 Hz, 1H), 7.17 (t, *J* = 9.2 Hz, 1H), 3.24 (s, 3H), 2.26 (d, *J* = 2.0 Hz, 3H). <sup>13</sup>C NMR (101 MHz, DMSO-*d*<sub>6</sub>) δ 163.3, 155.9, 154.3, 150.5, 150.1, 144.7, 134.9 (d, *J* = 2.9 Hz), 128.3, 126.3, 124.4 (d, *J* = 18.1 Hz), 123.0 (d, *J* = 4.8 Hz), 122.0, 119.5, 119.2 (d, *J* = 7.7 Hz), 116.9, 116.8, 115.1 (d, *J* = 23.5 Hz), 18.2, 14.4 (d, *J* = 3.1 Hz). HRMS (ESI<sup>+</sup>) *m/z* calcd for C<sub>19</sub>H<sub>14</sub>FN<sub>4</sub>O 333.1157, found 333.0049.

#### **Synthesis of ZW-1843 (*N*-(4-fluoro-3-methylphenyl)-2-methyl-1*H*-benzo[*b*][1,4]diazepine-3-carboxamide)**

ZW-1843 was synthesized following the general method A using *o*-Phenylenediamine as the amine.

<sup>1</sup>H NMR (600 MHz, DMSO-*d*<sub>6</sub>) δ 12.27 (d, *J* = 12.8 Hz, 1H), 11.94 (s, 1H), 8.49 (d, *J* = 12.8 Hz, 1H), 7.52 (dd, *J* = 7.1, 2.7 Hz, 1H), 7.48 (ddd, *J* = 7.8, 4.5, 2.7 Hz, 1H), 7.40 (dd, *J* = 8.1, 1.4 Hz, 1H), 7.09 (t, *J* = 9.1 Hz, 1H), 7.00 (td, *J* = 7.6, 1.4 Hz, 1H), 6.87 (dd, *J* = 8.0, 1.4 Hz, 1H), 6.74 (td, *J* = 7.6, 1.4 Hz, 1H), 5.02 (s, 2H), 2.44 (s, 3H), 2.23 (d, *J* = 1.9 Hz, 3H). <sup>13</sup>C NMR (101 MHz, DMSO) δ 197.1, 167.3, 158.3, 156.5, 156.0, 140.5, 134.9 (d, *J* = 2.8 Hz), 127.4, 126.9, 123.3 (d, *J* = 4.6 Hz), 125.4 – 114.6 (m), 119.6, 119.5 (d, *J* = 7.7 Hz), 118.6, 117.6, 103.1, 27.0, 14.7 (d, *J* = 3.1 Hz). HRMS (ESI) *m/z* calcd for C<sub>18</sub>H<sub>17</sub>FN<sub>3</sub>O<sub>2</sub> 326.1310, found 326.1298.

Synthesis of ZW-1842 (*N*-(4-fluoro-3-methylphenyl)-2,5-dimethylimidazo[1,2-*a*]pyrimidine-6-carboxamide)

ZW-1842 was synthesized following the general method A using 3-amino-5-methylpyrazole as the amine. <sup>1</sup>H NMR (600 MHz, DMSO-*d*<sub>6</sub>) δ 10.52 (s, 1H), 8.62 (s, 1H), 7.64 (d, *J* = 6.7 Hz, 1H), 7.55 – 7.51 (m, 1H), 7.15 (t, *J* = 9.1 Hz, 1H), 6.64 (s, 1H), 2.86 (d, *J* = 1.4 Hz, 3H), 2.49 (s, 3H), 2.25 (s, 3H). <sup>13</sup>C NMR (101 MHz, DMSO-*d*<sub>6</sub>) δ 163.3, 157.1 (d, *J* = 239.8 Hz), 155.6, 148.4, 147.7, 145.8, 134.9 (d, *J* = 2.8 Hz), 124.4 (d, *J* = 18.1 Hz), 123.0 (d, *J* = 4.5 Hz), 119.3 (d, *J* = 8.0 Hz), 116.4, 115.1 (d, *J* = 23.1 Hz), 96.5, 14.7, 14.6, 14.4 (d, *J* = 3.1 Hz). HRMS (ESI) *m/z* calcd for C<sub>16</sub>H<sub>14</sub>FN<sub>4</sub>O 297.1157, found 297.1152.

ZW-1840 (5-cyano-*N*-(4-fluoro-3-methylphenyl)-2-methyl-6-oxo-1,6-dihydropyridine-3-carboxamide)

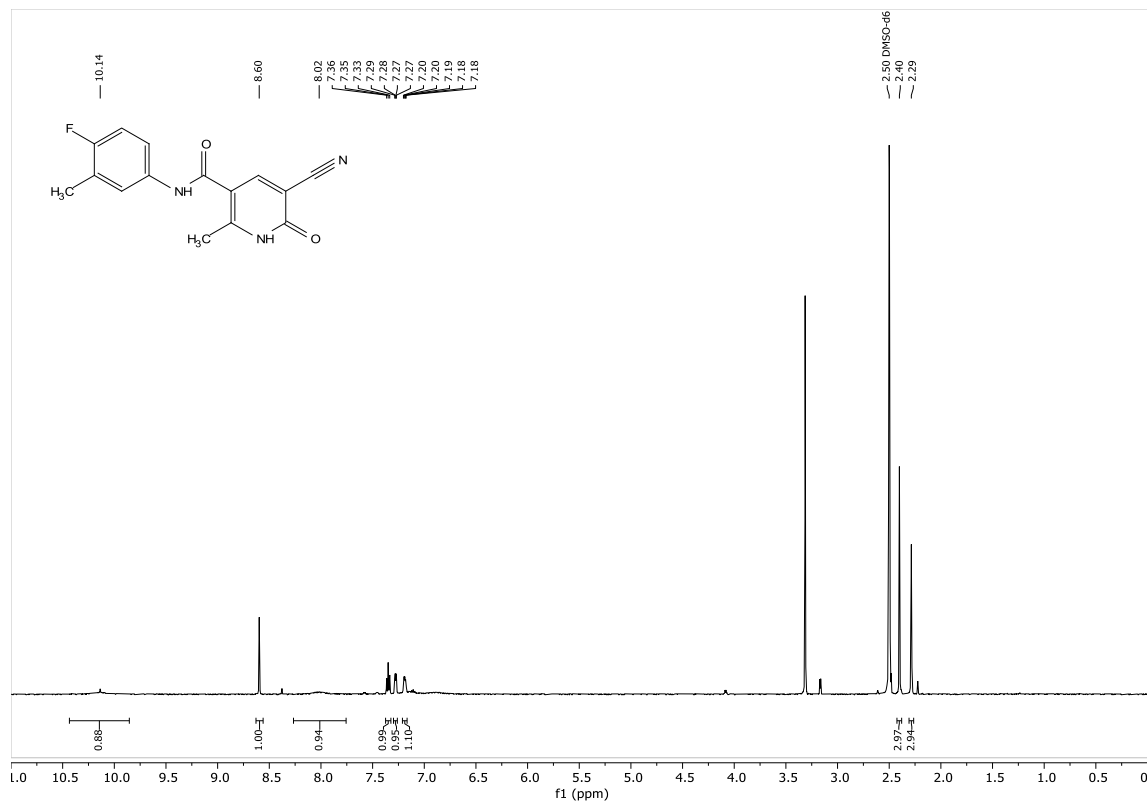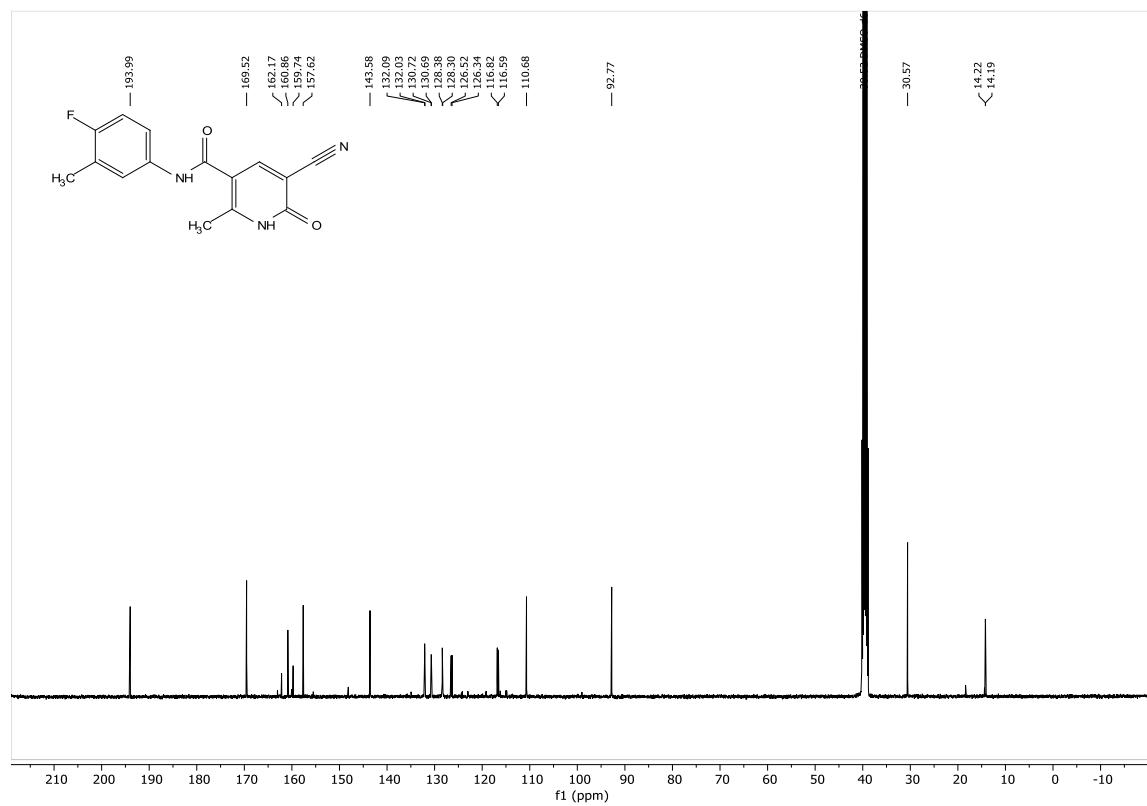

ZW-1841 (*N*-(4-fluoro-3-methylphenyl)-4-methylbenzo[4,5]imidazo[1,2-*a*]pyrimidine-3-carboxamide)

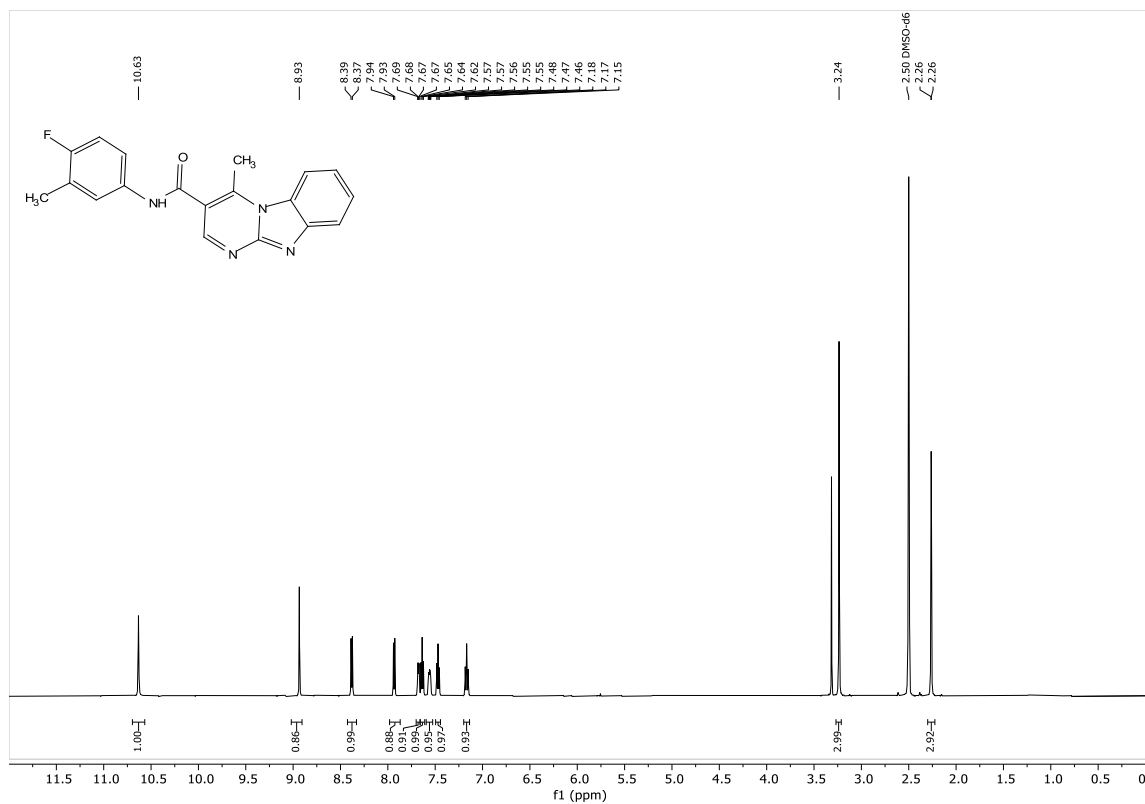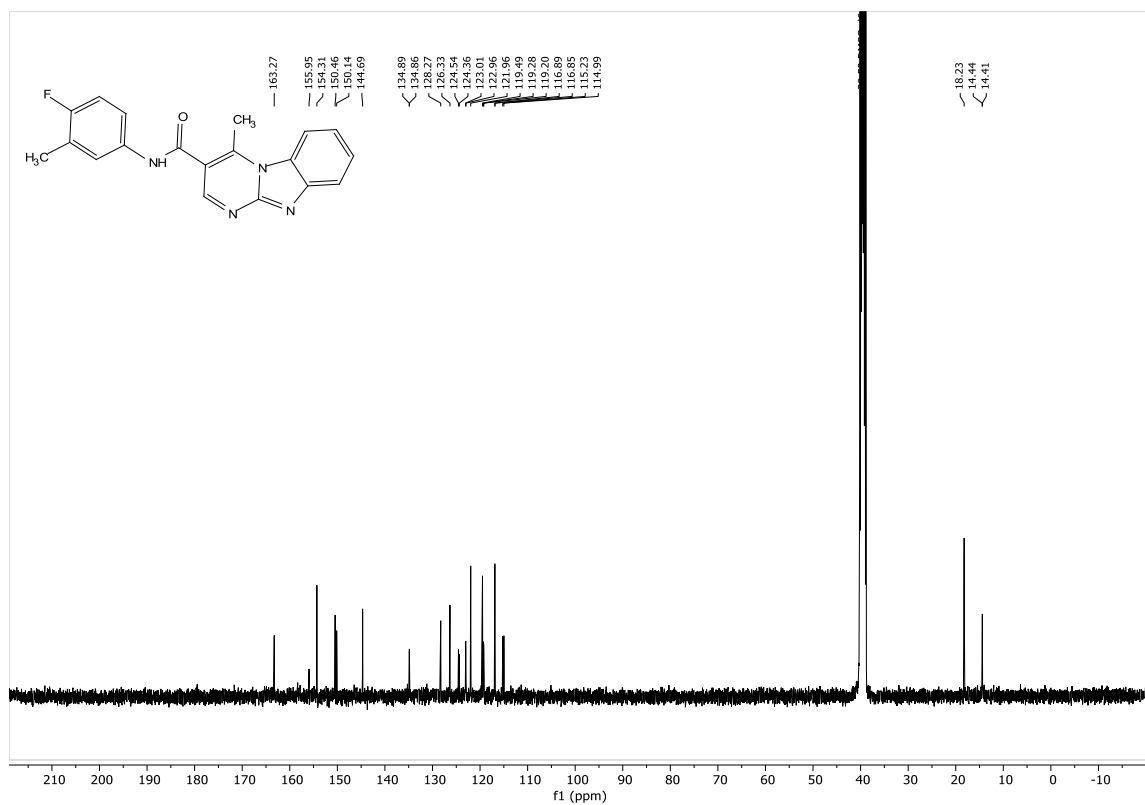



ZW-1842 (*N*-(4-fluoro-3-methylphenyl)-2,5-dimethylimidazo[1,2-*a*]pyrimidine-6-carboxamide)

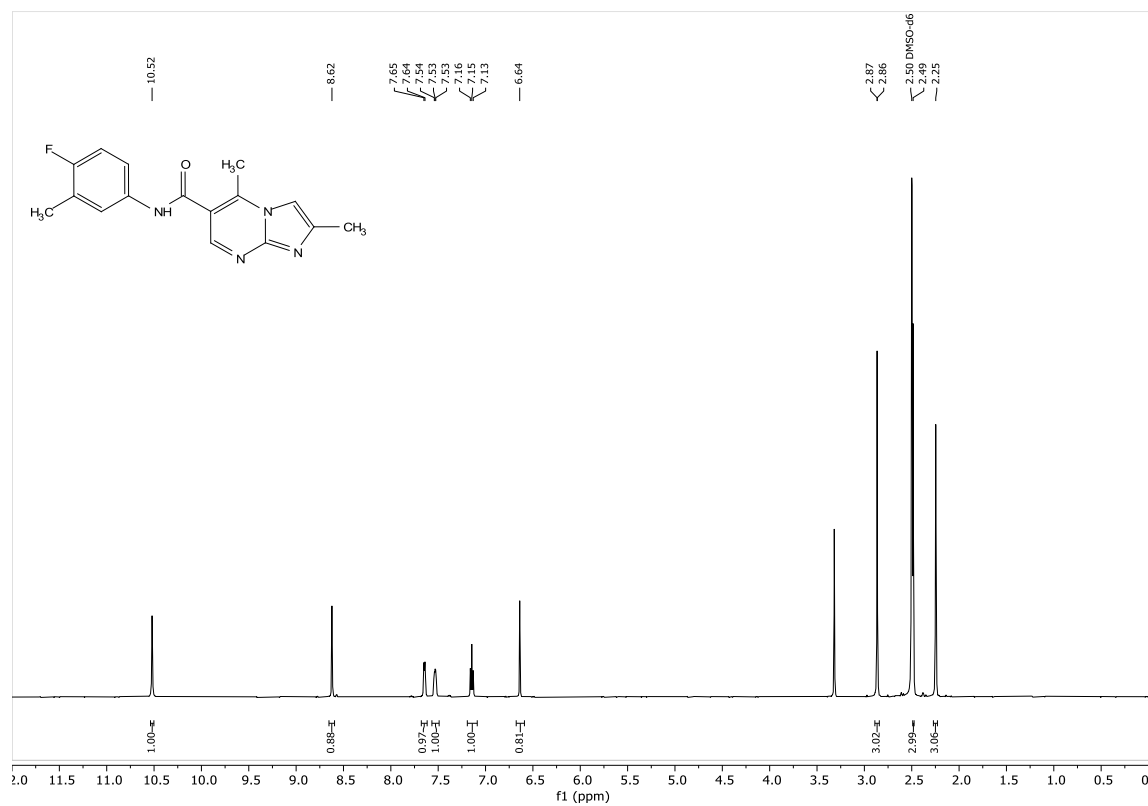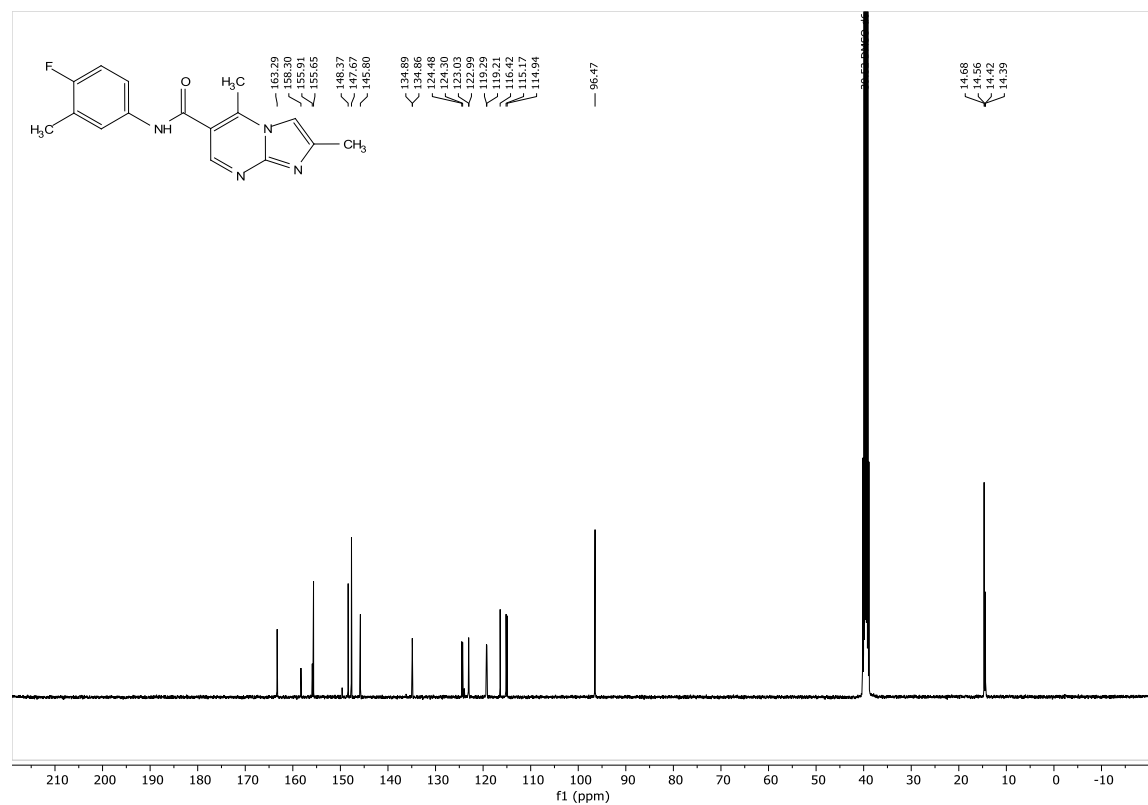

ZW-1843 (*N*-(4-fluoro-3-methylphenyl)-2-methyl-1*H*-benzo[*b*][1,4]diazepine-3-carboxamide)

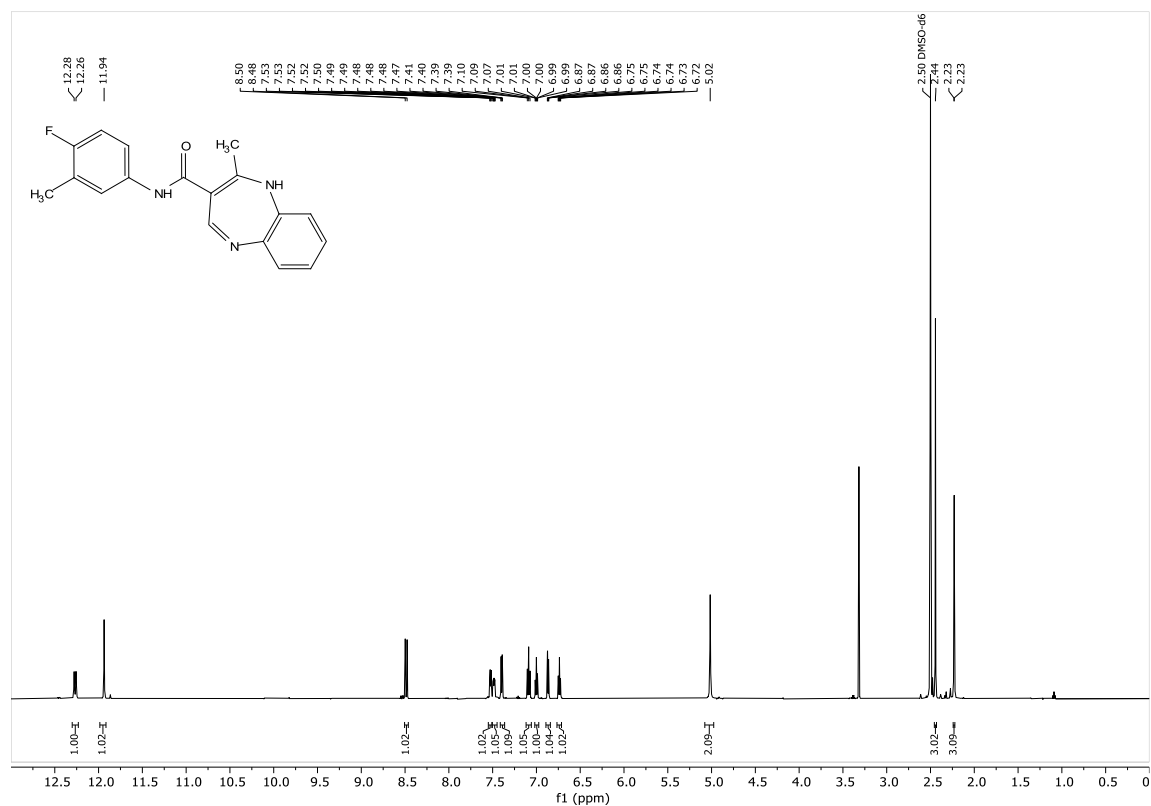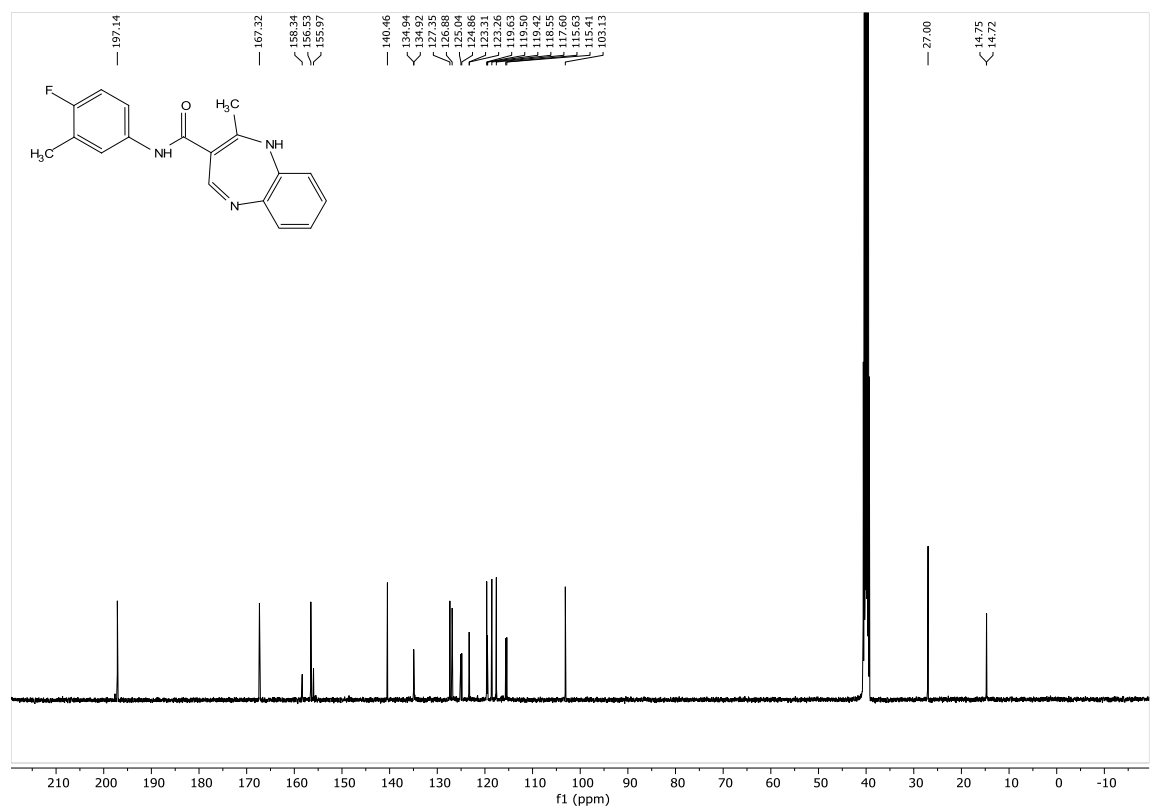

ZW-1845 (5-cyano-*N*-(4-fluoro-3-methylphenyl)-2-methyl-4-(methylthio)-6-oxo-1,6-dihydropyridine-3-carboxamide)

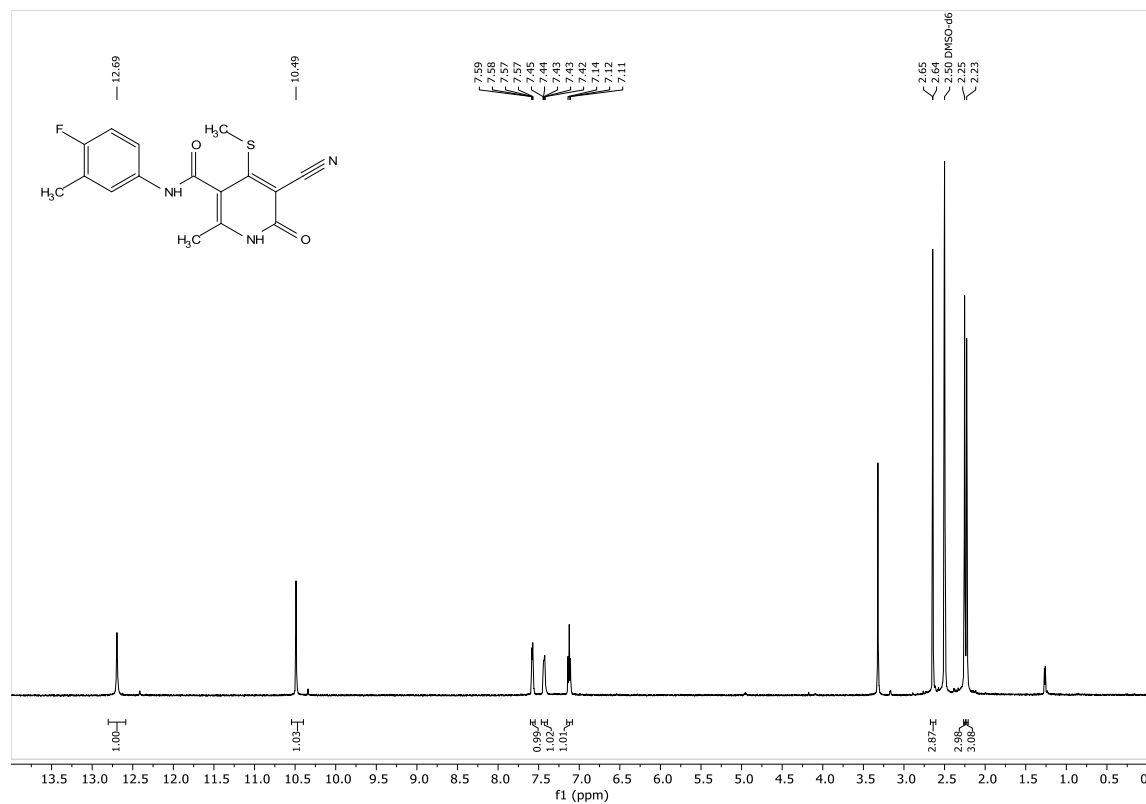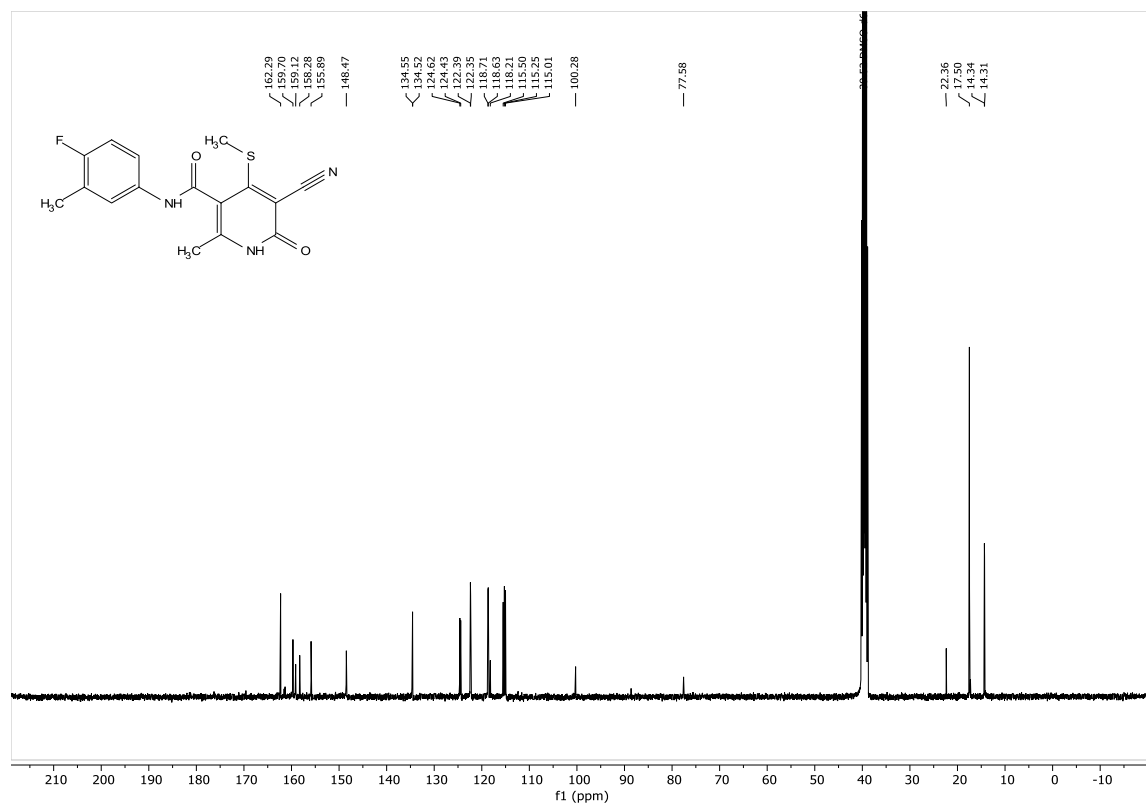

Cc1c2c(c[nH]1C(=O)c2NC(=O)c3ccc(F)cc3)N=CN

10.64, 7.57, 7.56, 7.54, 7.47, 7.46, 7.45, 7.44, 7.11, 7.10, 7.08, 6.03, 2.65, 2.23

2.06, 1.00, 1.00, 1.06, 1.88, 2.65, 3.18

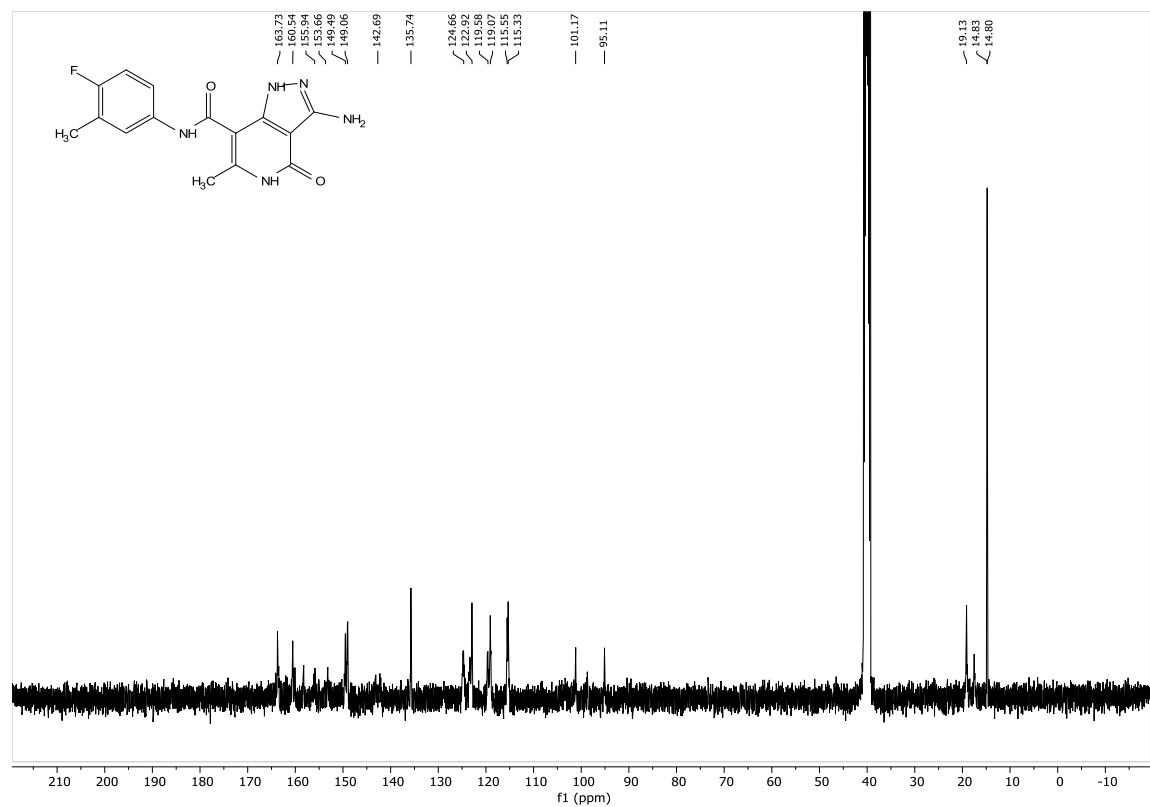

**Table S1:** Docking scores of the selected 100 compound from the virtual screening

| Compound ID | Enamine ID | Structure                                                                            | Docking score |
|-------------|------------|--------------------------------------------------------------------------------------|---------------|
| ZW-1872     | Z30720891  | 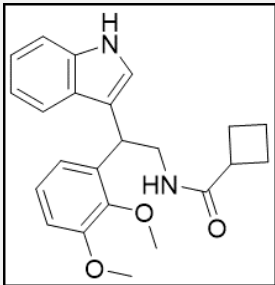   | -9.326        |
| ZW-1873     | Z82223107  |   | -8.153        |
| ZW-1874     | Z16336550  |  | -9.199        |
| ZW-1875     | Z94795453  |  | -9.525        |

|         |            |                                                                                      |        |
|---------|------------|--------------------------------------------------------------------------------------|--------|
| ZW-1876 | Z109819830 | 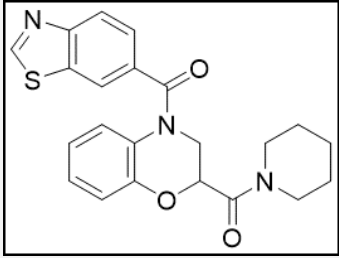   | -9.844 |
| ZW-1877 | Z127592722 |    | -9.57  |
| ZW-1878 | Z191910196 |    | -8.239 |
| ZW-1879 | Z94796944  |   | -8.628 |
| ZW-1880 | Z26394009  |  | -8.566 |

|         |            |                                                                                      |        |
|---------|------------|--------------------------------------------------------------------------------------|--------|
| ZW-1881 | Z229022754 | 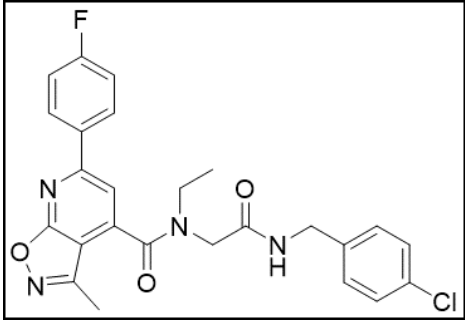   | -8.638 |
| ZW-1882 | Z28486756  |    | -9.02  |
| ZW-1883 | Z107734680 |   | -9.893 |
| ZW-1884 | Z641840076 |  | -9.874 |
| ZW-1885 | Z454209352 |  | -9.413 |

|         |             |                                                                                      |        |
|---------|-------------|--------------------------------------------------------------------------------------|--------|
| ZW-1886 | Z823355794  | 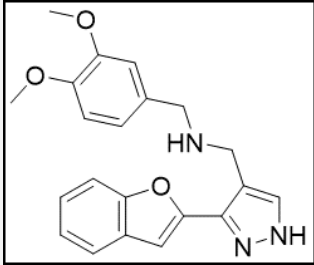   | -8.121 |
| ZW-1887 | Z290050640  |    | -8.342 |
| ZW-1888 | Z1128771581 |   | -9.168 |
| ZW-1889 | Z25701711   |  | -9.815 |
| ZW-1890 | Z106551590  |  | -9.481 |



|         |            |                                                                                      |        |
|---------|------------|--------------------------------------------------------------------------------------|--------|
| ZW-1891 | Z107737122 | 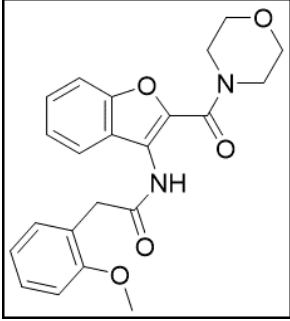   | -8.749 |
| ZW-1892 | Z222959730 |    | -8.363 |
| ZW-1893 | Z423526932 |   | -8.532 |
| ZW-1894 | Z70997275  |  | -9.486 |
| ZW-1895 | Z737544166 |  | -9.634 |

|         |            |                                                                                      |        |
|---------|------------|--------------------------------------------------------------------------------------|--------|
| ZW-1896 | Z823391464 | 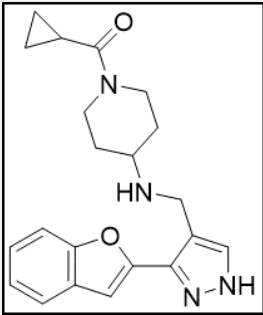   | -8.761 |
| ZW-1897 | Z775154976 |    | -9.348 |
| ZW-1898 | Z31837053  |   | -9.369 |
| ZW-1899 | Z146631714 |  | -9.289 |
| ZW-1900 | Z729772000 |  | -9.299 |

|         |             |                                                                                      |        |
|---------|-------------|--------------------------------------------------------------------------------------|--------|
| ZW-1901 | Z811777106  | 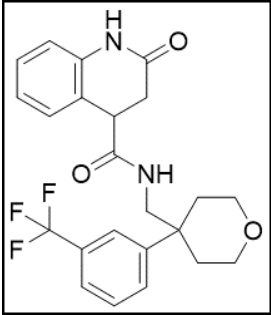   | -8.259 |
| ZW-1902 | Z1151438917 |    | -8.84  |
| ZW-1903 | Z228330960  |   | -8.321 |
| ZW-1904 | Z107735246  |  | -9.621 |
| ZW-1905 | Z89430021   |  | -8.039 |



|         |            |                                                                                      |        |
|---------|------------|--------------------------------------------------------------------------------------|--------|
| ZW-1912 | Z105621812 | 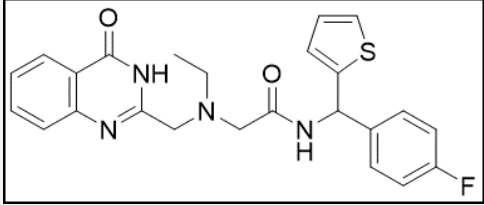   | -9.899 |
| ZW-1913 | Z65505905  |    | -8.07  |
| ZW-1914 | Z241198690 |    | -9.309 |
| ZW-1915 | Z91168313  |   | -8.221 |
| ZW-1916 | Z295900566 |  | -9.706 |
| ZW-1917 | Z337773320 |  | -9.359 |

|         |             |                                                                                      |         |
|---------|-------------|--------------------------------------------------------------------------------------|---------|
| ZW-1918 | Z109716338  | 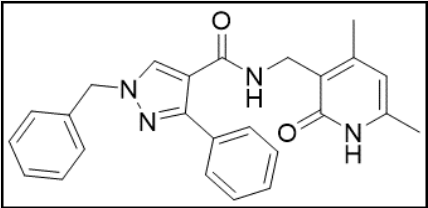   | -8.471  |
| ZW-1919 | Z1128156429 |    | -8.587  |
| ZW-1920 | Z1623886528 |   | -8.114  |
| ZW-1921 | Z1602504897 |  | -9.045  |
| ZW-1922 | Z728679124  |  | -10.088 |

|         |             |                                                                                      |         |
|---------|-------------|--------------------------------------------------------------------------------------|---------|
| ZW-1923 | Z1593368890 | 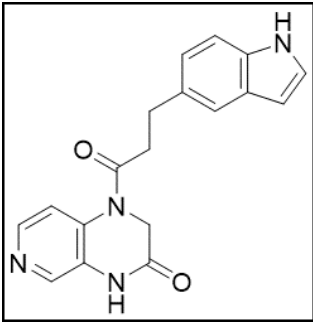   | -10.471 |
| ZW-1924 | Z367579514  |    | -9.213  |
| ZW-1925 | Z73327098   |   | -8.646  |
| ZW-1926 | Z90748473   |  | -8.158  |
| ZW-1927 | Z1656835879 |  | -8.453  |
| ZW-1928 | Z30842437   |  | -9.11   |

|         |             |                                                                                      |        |
|---------|-------------|--------------------------------------------------------------------------------------|--------|
| ZW-1929 | Z57701674   | 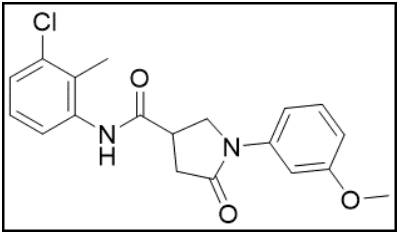   | -9.447 |
| ZW-1930 | Z57701673   |    | -9.922 |
| ZW-1931 | Z1677960943 |    | -8.79  |
| ZW-1932 | Z1187972693 |   | -8.296 |
| ZW-1933 | Z1252084076 |  | -9.268 |
| ZW-1934 | Z1255801905 |  | -8.751 |
| ZW-1935 | Z1281319177 |  | -9.448 |



|         |             |                                                                                      |         |
|---------|-------------|--------------------------------------------------------------------------------------|---------|
| ZW-1936 | Z300109858  | 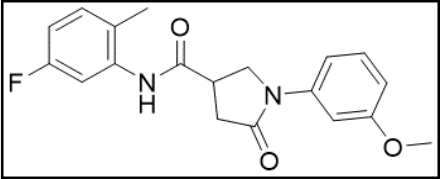   | -9.814  |
| ZW-1937 | Z235833630  |    | -10.368 |
| ZW-1938 | Z336817140  |    | -9.377  |
| ZW-1939 | Z30803645   |   | -10.092 |
| ZW-1940 | Z1213665994 |  | -8.137  |
| ZW-1941 | Z729234000  |  | -8.998  |

|         |             |                                                                                      |        |
|---------|-------------|--------------------------------------------------------------------------------------|--------|
| ZW-1942 | Z85937768   | 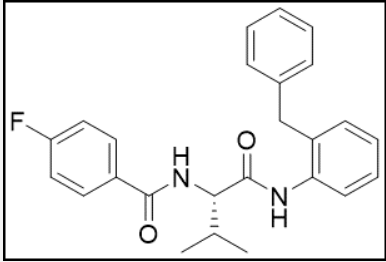   | -9.72  |
| ZW-1943 | Z1462439959 |    | -9.702 |
| ZW-1944 | Z200350408  |    | -8.078 |
| ZW-1945 | Z50928823   |   | -9.411 |
| ZW-1946 | Z241177004  |  | -8.685 |
| ZW-1947 | Z1126831590 |  | -8.071 |

|         |             |                                                                                      |        |
|---------|-------------|--------------------------------------------------------------------------------------|--------|
| ZW-1948 | Z1408114867 | 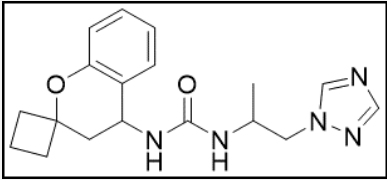   | -8.617 |
| ZW-1949 | Z57908252   |    | -8.028 |
| ZW-1950 | Z1835903985 |    | -9.211 |
| ZW-1951 | Z1317957310 |   | -9.625 |
| ZW-1952 | Z319818790  |  | -9.109 |
| ZW-1953 | Z166728380  |  | -9.47  |

|         |            |                                                                                      |         |
|---------|------------|--------------------------------------------------------------------------------------|---------|
| ZW-1954 | Z905720180 | 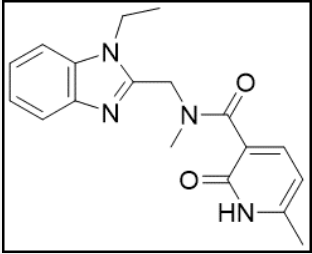   | -9.702  |
| ZW-1955 | Z651355106 |    | -10.158 |
| ZW-1956 | Z99371602  |   | -8.809  |
| ZW-1957 | Z30720840  |  | -8.414  |
| ZW-1958 | Z234988710 |  | -9.363  |

|         |            |                                                                                      |        |
|---------|------------|--------------------------------------------------------------------------------------|--------|
| ZW-1959 | Z408804338 | 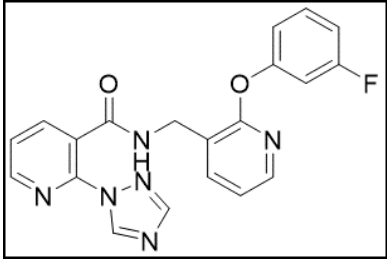   | -8.219 |
| ZW-1960 | Z296063700 |    | -9.467 |
| ZW-1961 | Z408065288 |   | -9.552 |
| ZW-1962 | Z412447334 |  | -9.615 |
| ZW-1963 | Z229362132 |  | -8.281 |

|         |            |                                                                                      |        |
|---------|------------|--------------------------------------------------------------------------------------|--------|
| ZW-1964 | Z102206636 | 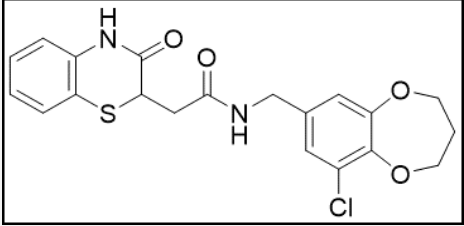   | -9.209 |
| ZW-1965 | Z167528448 |    | -9.564 |
| ZW-1966 | Z236589324 |    | -9.605 |
| ZW-1967 | Z97475999  |   | -8.012 |
| ZW-1968 | Z29122861  |  | -9.681 |

|         |             |                                                                                     |        |
|---------|-------------|-------------------------------------------------------------------------------------|--------|
| ZW-1969 | Z27624125   | 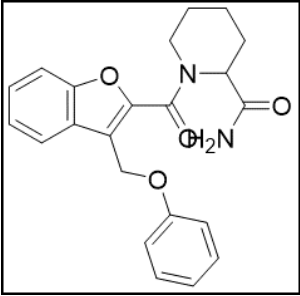  | -8.82  |
| ZW-1970 | Z31360254   |   | -8.769 |
| ZW-1971 | Z1713287452 |  | -8.603 |

**Figure S1:** Selected TSA curves

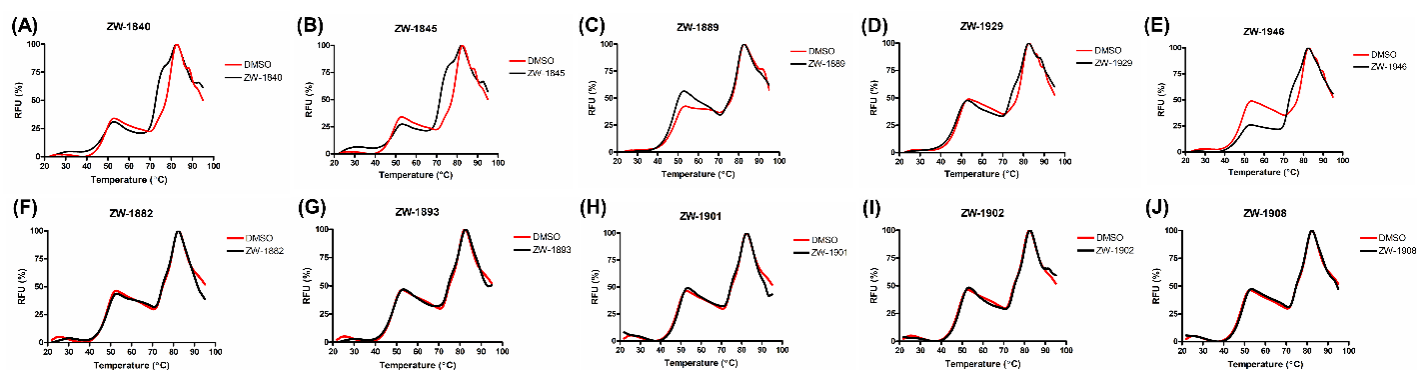

**Supplementary Figure 1.** (A-E) TSA profiles of additional selected hit compounds that bind to HBV Cp and affect capsid formation and stability. (F-J) Example TSA profiles of selected compounds screened that did not bind to HBV Cp. HBV Cp melting curves in the presence of 1% DMSO are shown in red; HBV Cp melting curves in the presence of 20  $\mu$ M compound and 1% DMSO are shown in black.

## References

1. Gama, F. H. S.; de Souza, R. O. M. A.; Garden, S. J., An efficient green protocol for the preparation of acetoacetamides and application of the methodology to a one-pot synthesis of Biginelli dihydropyrimidines. Expansion of dihydropyrimidine topological chemical space. *RSC Advances* **2015**, 5, (87), 70915-70928.
2. Abdelrazek, F. M.; Sharaf, M. F.; Metz, P.; Jaeger, A., The reaction of 2-dimethylaminomethylene-3-oxo-N-phenylbutyramide with active methylene nitriles. *J. Heterocycl. Chem.* **2010**, 47, (3), 528-533.
3. Savant, M. M.; Pansuriya, A. M.; Bhuva, C. V.; Kapuriya, N.; Patel, A. S.; Audichya, V. B.; Pipaliya, P. V.; Naliapara, Y. T., Water Mediated Construction of Trisubstituted Pyrazoles/Isoxazoles Library Using Ketene Dithioacetals. *J. Comb. Chem.* **2010**, 12, (1), 176-180.
4. Savant, M. M.; Ladva, K. D.; Pandit, A. B., Facile synthesis of highly functionalized novel pyrazolopyridones using oxoketene dithioacetal and their anti-HIV activity. *Synth. Commun.* **2018**, 48, (13), 1640-1648.
5. Abdelrazek, F. M.; Sobhy, N. A.; Metz, P.; Bazbouz, A. A., Synthetic studies with 3-Oxo-N-[4-(3-oxo- 3-phenylpropionylamino)-phenyl]-3-phenylpropionamide. *J. Heterocycl. Chem.* **2012**, 49, (2), 381-387.
